# Supplementary material
Source: MDPI journal article supplement (https://www.mdpi.com/1999-4907/13/12/2058)
Supplement: s1 [file s1 › forests-1961842-supplementary.pdf]

# Supplementary material 1

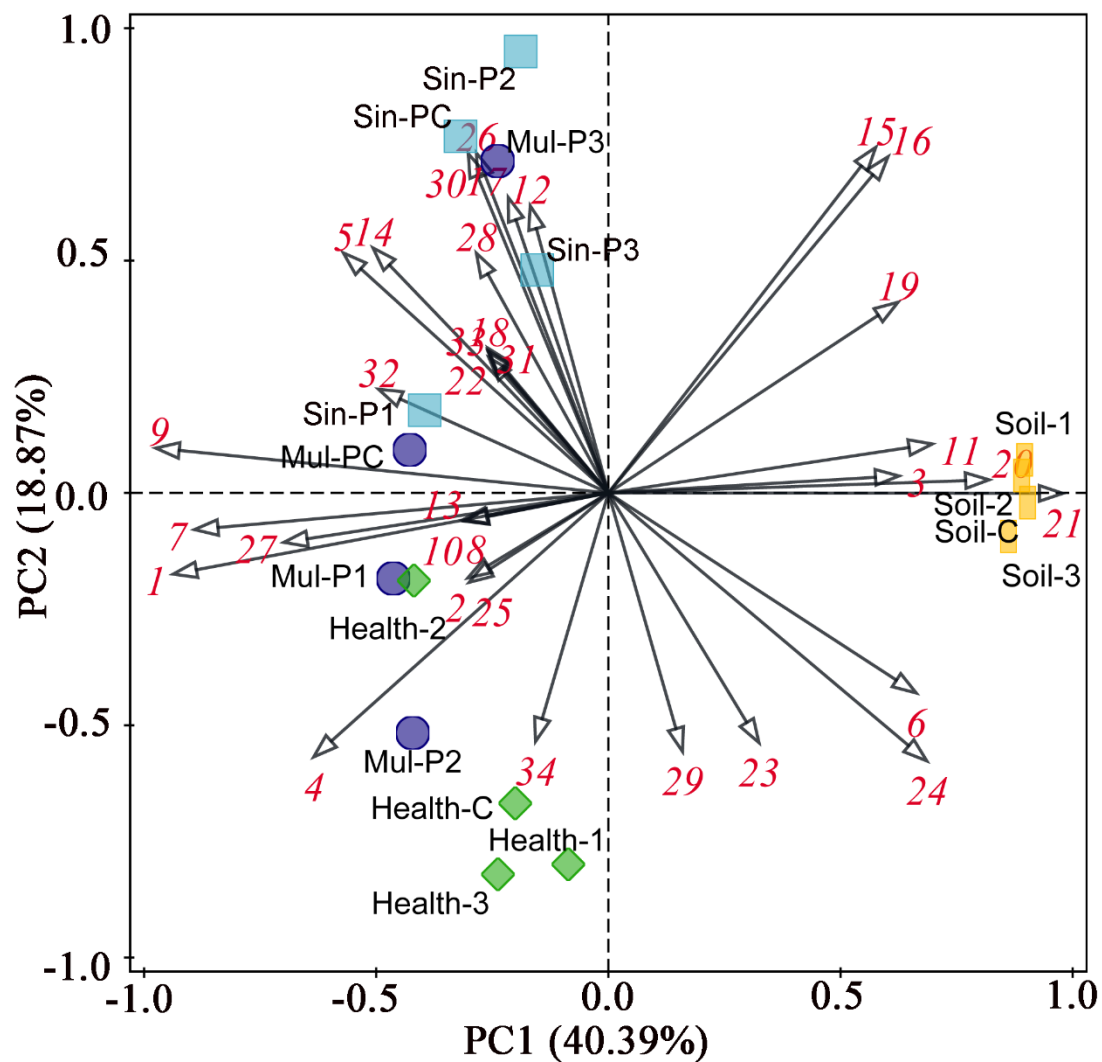

**Figure S1** Principal component analysis (PCA) of volatiles identified by dynamic headspace adsorption on the eucalyptus trunk and shallow soil

Purple circle: multi-packages treatments (Mul-P1, Mul-P2, Mul-P3; Mul-PC means combine all the volatiles of Mul-P1, Mul-P2 and Mul-P3); blue square: single package treatments (Sin-P1, Sin-P2, Sin-P3; Sin-PC means combine all the volatiles of single package); green filled diamond: health trunk treatments (Health-1, Health-2, Health-3; Health-C means combine all the volatiles of health); yellow square: shallow soil treatments (Shallow soil-1, Shallow soil-2, Shallow soil-3; Shallow soil-C means combine all the volatiles of shallow soil). Number same as Table 1.
